# Supplementary material for: Heterogeneous metallaphotoredox catalysis in a continuous-flow packed-bed reactor
Source: publisher site journal article supplement (doi:10.3762/bjoc.18.115), 2022-08-29

# NMRcontrol\_autointegration

June 21, 2022

```
In [8]: import asyncio
import numpy as np
import pandas as pd
import matplotlib.pyplot as plt
import itertools as it
from flowchem.components.devices.Magritek import Spinsolve, NMRspectrum
from flowchem import Knauer16PortValve
```

```
In [ ]: # Acquisition and integration settings

# set the wait time between two NMR measurement
NMR_DELAY = 60 * 2 # in sec
counter = it.count()

# set the integration limits (in ppm)
peak_list = np.array(
    [['SM', -60.85, -61.1 ],
     ['Product', -61.1 , -61.35],
     ['Side-P', -60.5 , -60.7 ]]
)
```

```
In [ ]: async def Analysis(observed_result):
    nmr = Spinsolve(host="BSMC-YMEF002121")

    while True:
        path = await nmr.run_protocol(
            "1D FLUORINE+",
            {
                "Number": 128,
                "AcquisitionTime": 3.2,
                "RepetitionTime": 2,
                "PulseAngle": 90,
            },
        )
        observed_time = (NMR_DELAY / 60 + 4) * next(counter)

        peak_normalized_list = peak_acquire_process(path)
```

```

observed_result = observed_result.append(
    pd.DataFrame(
        peak_normalized_list,
        index=["SM", "product", "side-P"],
        columns=[observed_time],
    ).T
)

# Print results
print(observed_result)

# save to CSV
observed_result.to_csv(
    r"W:\BS-FlowChemistry\People\Wei-Hsin\Spinsolve\dataframe_0317_03.csv",
    header=True,
)

plt.figure()
observed_result.plot()
plt.legend(loc="best")
plt.savefig(
    r"W:\BS-FlowChemistry\People\Wei-Hsin\Spinsolve\plot_0317_03.png"
)

await asyncio.sleep(NMR_DELAY)

```

```

In [ ]: def peak_acquire_process(path):
    spectrum = NMRspectrum(path)
    spectrum.process()

    peak_sum_list = []

    # loop over the integration limits
    for name, start, end in peak_list:
        min = spectrum.uc(start, "ppm")
        max = spectrum.uc(end, "ppm")
        if min > max:
            min, max = max, min
        # extract the peak
        peak = spectrum.processed_data[min : max + 1]
        peak_sum_list.append(peak.sum())

    # peak normalization
    y = sum(peak_sum_list)
    peak_normalized_list = [i / y for i in peak_sum_list]
    return peak_normalized_list

```

```

In [ ]: async def main():
    observed_time = 0

```

```

observed_result = pd.DataFrame(
    [1, 0, 0], index=["SM", "product", "side-P"], columns=[observed_time]
).T
await Analysis(observed_result)

if __name__ == "__main__":
    asyncio.run(main())

```

## 0.1 Example results

A panda dataframe from an experiment is used to show exemplary results.

```

In [7]: %matplotlib inline
result_file = r"220405_in-line_whhsu044_rate10uLmin_50_02.csv"
df = pd.read_csv(result_file)

df.plot(x=0, xlabel= 'Time (min)')

```

Out[7]: <matplotlib.axes.\_subplots.AxesSubplot at 0x2d4f65e1c50>

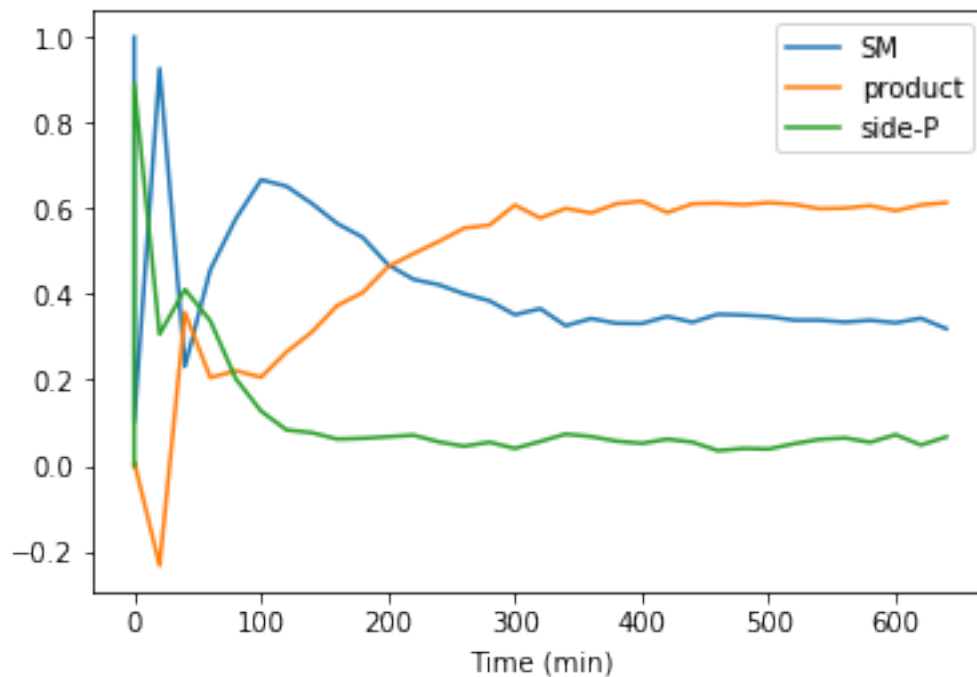

Supplement: Additional file 3 [file 1860-5397-18-115-S3.zip]
